# Supplementary material for: Climatic variability in the Sine-Saloum basin and its impacts on water resources: case of the Sob and Diohine watersheds in the region of Niakhar
Source: Copernicus journal article supplement (doi:10.5194/piahs-383-391-2020), 2020-09-16
Supplement: Supplementary file 1 [file piahs-383-391-2020-supplement.zip]

Archive with 2 entries (2 files):
- piahs-383-391-2020-supplement-title-page.pdf
- WalyOrange_PIAHS2020_metadata.xlsx
