# Supplementary material for: Climatic variability in the Sine-Saloum basin and its impacts on water resources: case of the Sob and Diohine watersheds in the region of Niakhar
Source: Copernicus journal article supplement (doi:10.5194/piahs-383-391-2020), 2020-09-16
Supplement: Supplementary file 1 [file piahs-383-391-2020-supplement.zip › piahs-383-391-2020-supplement-title-page.pdf]

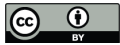

## *Supplement of*

# **Climatic variability in the Sine-Saloum basin and its impacts on water resources: case of the Sob and Diohine watersheds in the region of Niakhar**

**Waly Faye et al.**

*Correspondence to:* Didier Orange ([didier.orange@ird.fr](mailto:didier.orange@ird.fr))

- [piahs-383-391-2020-supplement-title-page.pdf](#)
- [WalyOrange\\_PIAHS2020\\_metadata.xlsx](#)

The copyright of individual parts of the supplement might differ from the CC BY 4.0 License.
