# Supplementary material for: Climatic variability in the Sine-Saloum basin and its impacts on water resources: case of the Sob and Diohine watersheds in the region of Niakhar
Source: Copernicus journal article supplement (doi:10.5194/piahs-383-391-2020), 2020-09-16
Supplement: Supplementary file 1 [file piahs-383-391-2020-supplement.zip › WalyOrange_PIAHS2020_metadata.xlsx]

## Sheet: Pluvio data Resume
	Station	P/S	Fréquence	Etendue d	Etendue m,y	Origine
	Fatick	S	d,m,y	1950-2008	1918-2016	ANACIM
	Mbour	S	d,m,y	1950-2004	1931-2016	ANACIM
	Bambey	S	d,m,y	1950-2008	1950-2016	ANACIM
	Goassas	P	d,m,y	1950-2004	1950-2009	ANACIM
	Thaidiaye	P	d,m	néant	1950-2011	ANACIM
	Diourbel	S	d,m,y	1950-2008	1919-2016	ANACIM

## Sheet: Water Quality, Original Data
	Puits	X	Y	NS (m)	pH	Cond ms/cm	Salt %	Observation
	Ndiuolbeth P1	-16.3789	14.5273	9.9	7.15	9.58	0.36	Abandonné
	Ndioulbeth P2	-16.3808	14.5289	9.1	6.88	6.33	0.19	Abreuvoir
	Mboltogne P1	-16.3954	14.5029	7.6	7.24	0.1604	0.07	Eau potable
	Mboltogne p2	-16.3968	14.5023	7.8	6.48	8.53	0.47	Abreuvoir
	Niakhar (Sindiane)	-16.3945	14.4881	6.5	6.11	0.203	0.01	Eau potable
	Sass Ndiafadjie P1	-16.4157	14.5099	7.3	7.1	9.34	0.35	Abandonné
	Sass Ndiafadjie P2	-16.4206	14.503	4	6.9	18.55	1.2	Abreuvoir
	Ndianeme (Puits carriere)	-16.4069	14.484	3	7	5.37	0.23	Abreuvoir & travaux domestiques
	Ndianeme	-16.4057	14.4874	4.7	7.06	6.16	0.3	Eau potable
	Sassar	-16.4101	14.4759	4.7	7.2	11.01	0.46	Abandonné
	Yenguele P1	-16.4165	14.4678	5.2	6.92	15.35	0.4	Briques
	Yenguele P2	-16.4215	14.4746	5	7.33	0.1061	0.03	Eau potable
	Yenguele P3	-16.4217	14.4747	3.5	6.88	0.126	0.01	Eau potable
	Yenguele 2	-16.4332	14.4567	5.2	7.17	41.2	3.1	Abandonné
	Kobo Sikil P1	-16.4495	14.4477	2.5	7.23	0.998	0.02	Abreuvoir
	Kobo Sikil P2	-16.4524	14.4479	2.3	6.81	11.23	0.47	Abreuvoir
	Kobo Sikil P3	-16.4522	14.4479	2.6	7.23	5.95	0.19	Abreuvoir
	Diane	-16.4482	14.4407	6.25	6.95	5.35	0.19	Abreuvoir & travaux domestiques
	Songhorma P1	-16.4564	14.435	2.35	7.43	3.74	0.07	Abreuvoir
	Songhorma P2	-16.4556	14.4347	3	6.96	4.75	0.13	Abreuvoir
	Songhorma P3	-16.4609	14.4357	2.1	7.24	7.71	0.4	Abreuvoir
	Songhorma P4	-16.4613	14.4355	2	7.41	4.73	0.3	Abreuvoir
	Songhorma P5	-16.4614	14.4355	1.5	7.35	5.13	0.3	Abreuvoir
	Diarrere	-16.4785	14.441	5.1	5.97	0.819	0.04	Eau potable
	Nerane P1 (32)	-16.4878	14.4303	4.05	5.45	1.08	0.07	Eau potable & Abreuvoir
	Nerane P2 (33)	-16.4892	14.4248	4.5	7.32	0.211	0.02	Eau potable
	Nerane P3 (34)	-16.491	14.4176	4.57	5.44	0.332	0.02	Eau potable
	Nerane P4 (35)	-16.491	14.4178	4.05	6.41	0.145	0.01	Eau potable
	Mbassis P1	-16.4967	14.4076	5.3	7.07	6.37	0.39	Abreuvoir
	Mbassis P2	-16.4998	14.4054	4.9	6.44	17.54	1	Abreuvoir
	Senghor P1	-16.5062	14.4026	3.13	7.14	5.59	0.42	Abreuvoir
	Senghor P2	-16.5082	14.4008	4.05	5.64	1.959	0.12	Abreuvoir
	Doudam	-16.5102	14.3881	3.3	6.1	4.2	0.21	Abreuvoir
	Parar	-16.4976	14.3827	3.4	7.14	3.61	0.23	Abreuvoir
	Nieless P1	-16.4822	14.3933	5.4	7.2	0.738	0.05	Puits école
	Nieless P2	-16.4786	14.3931	3.5	6.29	0.242	0.01	Puits école
	Nieless P3	-16.4786	14.3932	4.05	8.18	0.949	0.09	Puits école
	Nieless P4	-16.4786	14.3932	4	9.91	0.156	<0,1	Puits école
	Sangharé (Mbine Sémou)	-16.4759	14.3928	4.5	6.67	0.16	0.01	Eau potable
	Sangharé	-16.4664	14.3886	3.75	8.17	2.8	0.11	Abreuvoir
	Sangharé	-16.464	14.3889	3.9	6	0.399	0.02	Eau potable
	Ndoundoh	-16.4708	14.4051	2.45	8.28	1.819	0.21	Abandonné
	Bicole P1	-16.4572	14.4116	4	4.87	1.063	0.07	Eau potable
	Bicole P2	-16.457	14.4116	3.2	6.29	7.14	0.42	Eau potable
	Bicole P3	-16.4529	14.415	5.4	6.29	0.112	<0,1	Eau potable
	Bicole P4	-16.453	14.4155	5	7.63	0.301	0.01	Eau potable
	Bicole P5	-16.4531	14.4158	4.4	8.1	0.589	0.03	Eau potable
	Bicole P6	-16.4525	14.4158	5	8.38	0.29	0.01	Eau potable
	Bicole P7	-16.4526	14.4155	4.7	8.46	0.314	0.01	Eau potable
	Bicole P8	-16.446	14.4173	4.2	5.71	0.255	0.01	Eau potable
	Bicole (Mboufoudji) P9	-16.4434	14.42	3.65	6.06	5.59	0.38	Abreuvoir
	Niondoune P1	-16.4378	14.4251	4.75	6.66	6.2	0.34	Abreuvoir
	Niondoune P2	-16.438	14.4307	3.82	5.13	2.7	0.15	Abreuvoir
	Sandiguem (Diohine) P1	-16.4876	14.5124	1.95	6.6	2.83	0.09	Abreuvoir
	Sandiguem (Diohine) P2	-16.4879	14.5116	1.65	7.3	15.83	0.7	Abreuvoir
	Sandiguem (Diohine) P3	-16.4885	14.5125	1.5	6.8	23.5	1	Abreuvoir
	Sandiguem (Diohine) P4	-16.4909	14.5111	2.65	7.06	8.78	0.33	Abreuvoir
	Diohine P1	-16.4912	14.5048	1	6.86	23.6	1.1	Abreuvoir
	Diohine P2	-16.4911	14.5045	1.5	6.84	20	0.72	Abreuvoir
	Diohine P3	-16.4908	14.5035	1.7	6.75	8.87	0.26	Abreuvoir
	Puits 0 Baobab	-16.4538	14.4886	4.7	6.93	14.7	0.46	Eau potable
	Puits 1 Dam	-16.4679	14.4796	3.3	7.62	15.87	0.52	Abandonné
	Puits 2 Lem	-16.4682	14.467	4.6	7.56	0.585	0.04	Eau potable
	Puits 3 Lem	-16.495	14.4989	2.9	7.3	10.36	0.31	Briques
	Puits 4 Mokane Ngouye	-16.495	14.499	3.75	7.34	15.08	0.53	Briques
	Puits 5 Mokane	-16.4846	14.4555	4.5	6.55	1.426	0.04	Eau potable
	Puits 6 Mokane Ndourky	-16.5298	14.4508	4.05	7.55	0.279	0.01	Eau potable
	Puits 7 Mbissel	-16.4997	14.4519	2.7	6.46	19.7	0.76	Travaux Domestiques
	Puits 8 Nguithième (Senghor)	-16.5116	14.4044	4.6	7.25	0.341	< 0,01	Eau potable
	Puits 9 Diourroup	-16.5256	14.3785	6	7.04	1.875	0.07	Jardinage
	Puits 10 Diourroup	-16.5253	14.3785	4.5	7.54	3.26	0.13	Jardinage
	Puits 11 Diourroup	-16.5259	14.379	4.2	7.76	2.95	0.14	Jardinage
	Puits 12	-16.4921	14.3727	4.2	5.57	0.374	0.03	Eau potable
	Puits 13	-16.4924	14.3713	4.2	5.37	0.374	0.02	Eau potable
	Puits 14	-16.4919	14.3791	5.9	7.42	5.36	0.19	Abreuvoir
	Puits 15	-16.4937	14.38	4.4	6.06	0.144	<0,01	Eau potable
	Puits 16	-16.4871	14.4071	2.3	8.59	26.3	1.5	Abandonné
	Puits 17	-16.487	14.4074	2.8	7.94	8.91	0.32	Abreuvoir
